# Supplementary material
Source: PubMed Central journal article supplement (PMC8444063)
Supplement: jamasurg-e214412-s001.pdf [file jamasurg-e214412-s001.pdf]

## Supplemental Online Content

Bowyer MW, Andreatta PB, Armstrong JH, Remick KN, Elster EA. A novel paradigm for surgical skills training and assessment of competency. *JAMA Surg*. Published online September 15, 2021. doi:10.1001/jamasurg.2021.4412

**eTable.** Example Procedural Assessment Instrument - Cricothyroidotomy

This supplemental material has been provided by the authors to give readers additional information about their work.

**eTable: Example Procedural Assessment Instrument - Cricothyroidotomy**

| Procedural Step                              | Performance Category                   | Score | Measure |
|----------------------------------------------|----------------------------------------|-------|---------|
| Identify/Mark Landmarks                      | N/A                                    | 0     | Nominal |
|                                              | Sternal Notch                          | 1     | Scale   |
|                                              | Notch of Thyroid Cartilage             | 1     | Scale   |
|                                              | Cricothyroid Membrane                  | 1     | Scale   |
|                                              | Required Guidance                      | -1    | Scale   |
|                                              | Performed Independently                | 1     | Scale   |
|                                              | Performed Efficiently                  | .5    | Scale   |
| Incise, Open Cricothyroid Membrane (CTM)     | N/A                                    | 0     | Nominal |
|                                              | Stabilize neck with non-dominant hand  | 1     | Scale   |
|                                              | Vertical incision, 3-5cm over CTM      | 1     | Scale   |
|                                              | Palpate, Confirm CTM                   | 1     | Scale   |
|                                              | Incise CTM, Horizontal, 1cm            | 1     | Scale   |
|                                              | Avoid Perforating Vessels, Vocal Cords | 1     | Scale   |
|                                              | Dilate CTM w/ back of scalpel          | 1     | Scale   |
|                                              | Required Guidance                      | -1    | Scale   |
|                                              | Performed Independently                | 1     | Scale   |
|                                              | Performed Efficiently                  | .5    | Scale   |
| Place/Secure Tracheostomy/Endotracheal Tube  | N/A                                    | 0     | Nominal |
|                                              | Required Substantial Guidance          | -1    | Scale   |
|                                              | Required Minor Guidance                | .5    | Scale   |
|                                              | No Guidance Required                   | 1     | Scale   |
|                                              | Efficient, No Guidance Required        | 1.5   | Scale   |
| Understanding of Relevant Anatomy            | N/A                                    |       | Nominal |
|                                              | Required Substantial Guidance          | -1    | Scale   |
|                                              | Required Minor Guidance                | .5    | Scale   |
|                                              | No Guidance Required                   | 1     | Scale   |
|                                              | Efficient, No Guidance Required        | 1.5   | Scale   |
| Understanding of Procedural Steps            | N/A                                    |       | Nominal |
|                                              | Required Substantial Guidance          | -1    | Scale   |
|                                              | Required Minor Guidance                | .5    | Scale   |
|                                              | No Guidance Required                   | 1     | Scale   |
|                                              | Efficient, No Guidance Required        | 1.5   | Scale   |
| Overall ability to perform Cricothyroidotomy | Beginner                               | 1     | Nominal |
|                                              | Transitional                           | 2     | Nominal |
|                                              | Competent                              | 3     | Nominal |
|                                              | Advanced                               | 4     | Nominal |
|                                              | Expert                                 | 5     | Nominal |
